# Supplementary material
Source: PubMed Central journal article supplement (PMC8373798)

**A** Supporting information, Figure 1:  
Linear regression analysis of the changes in liver stiffness (kPa) (A), spleen stiffness (kPa) (B) and changes in HVPG (mmHg)

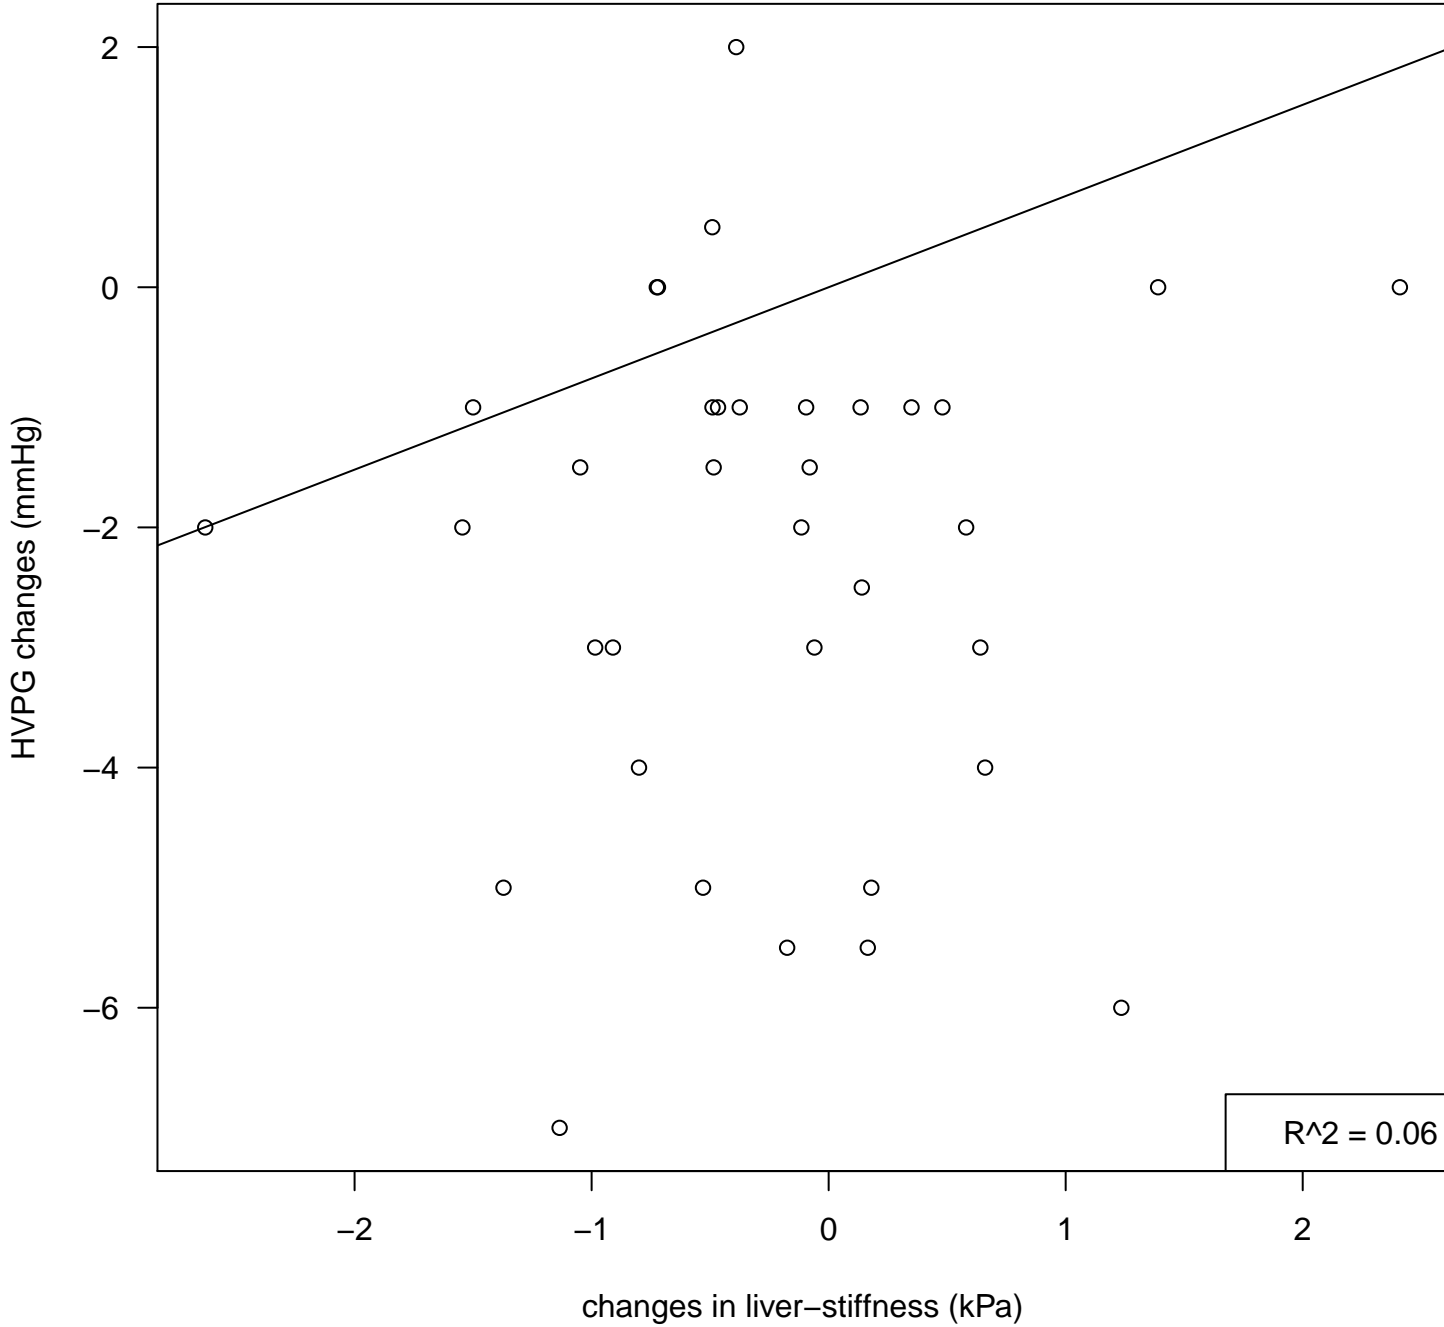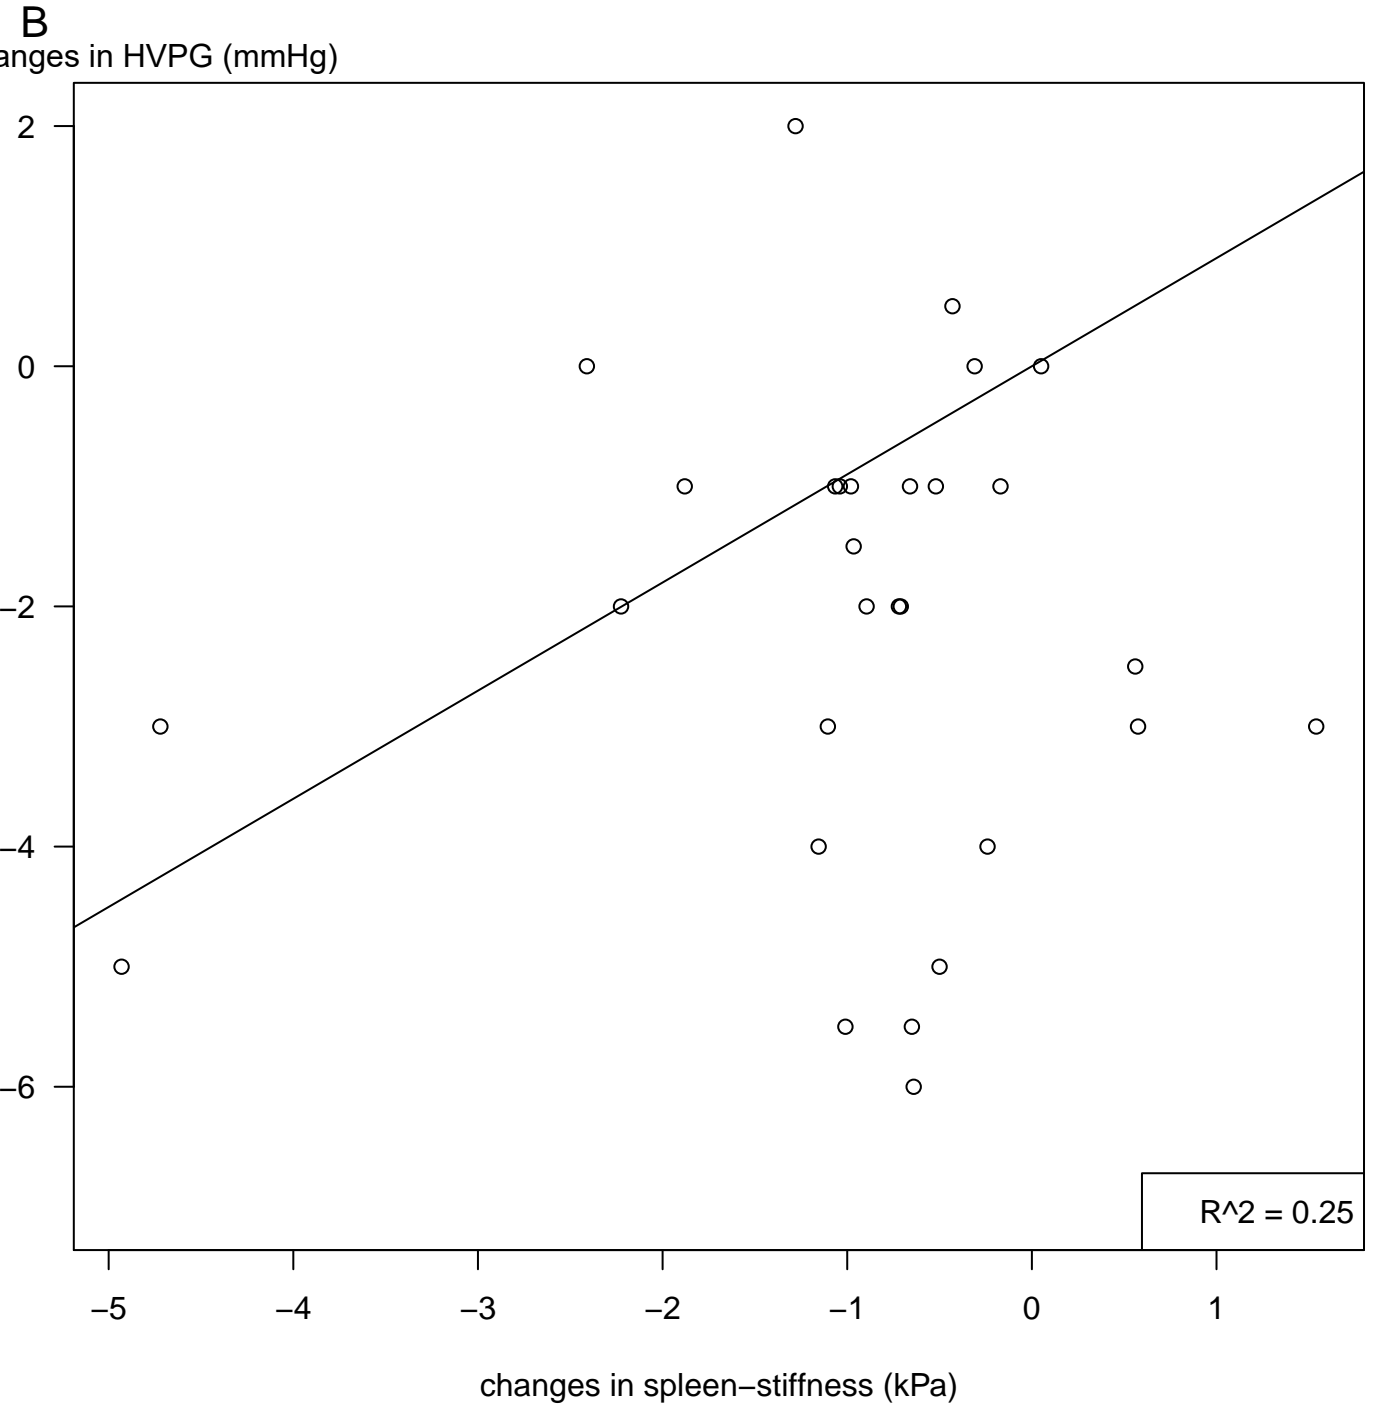

Supplement: NIHMS1710142-supplement-fS1.pdf [file NIHMS1710142-supplement-fS1.pdf]
