# Supplementary material
Source: PubMed Central journal article supplement (PMC8373798)
Supplement: NIHMS1710142-supplement-tS1.pdf [file NIHMS1710142-supplement-tS1.pdf]

**Supporting information, Table 1:****Correlation between liver or spleen stiffness and Child-Pugh score and MELD-Na score**

|                         | Child-Pugh score |                 |                      | MELD- Na score   |                 |                      |
|-------------------------|------------------|-----------------|----------------------|------------------|-----------------|----------------------|
|                         | Correlation      | <i>p</i> -value | R <sup>2</sup> value | Correlation      | <i>p</i> -value | R <sup>2</sup> value |
| <b>Liver stiffness</b>  | 0.52 (0.38;0.66) | <0.001          | 0.90                 | 1.00 (0.77;1.23) | <0.001          | 0.92                 |
| <b>Spleen stiffness</b> | 0.43 (0.34;0.53) | <0.001          | 0.94                 | 0.70 (0.51;0.90) | <0.001          | 0.93                 |

Results are presented as association between 1 kPa in stiffness equalized Child-Pugh value or MELD-Na value with 95% confidence interval, r<sup>2</sup>-value and *p*-value
